# Supplementary material
Source: publisher figshare collection journal article supplement (https://frontiersin.figshare.com/ndownloader/files/26538185)
Supplement: Supplementary file [file 26538185]

## *Supplementary Material*

### **1 Supplementary Figures and Tables**

For more information on Supplementary Material and for details on the different file types accepted, please see [here](#). Figures, tables, and images will be published under a Creative Commons CC-BY licence and permission must be obtained for use of copyrighted material from other sources (including re-published/adapted/modified/partial figures and images from the internet). It is the responsibility of the authors to acquire the licenses, to follow any citation instructions requested by third-party rights holders, and cover any supplementary charges.

#### **1.1 Supplementary Figures**

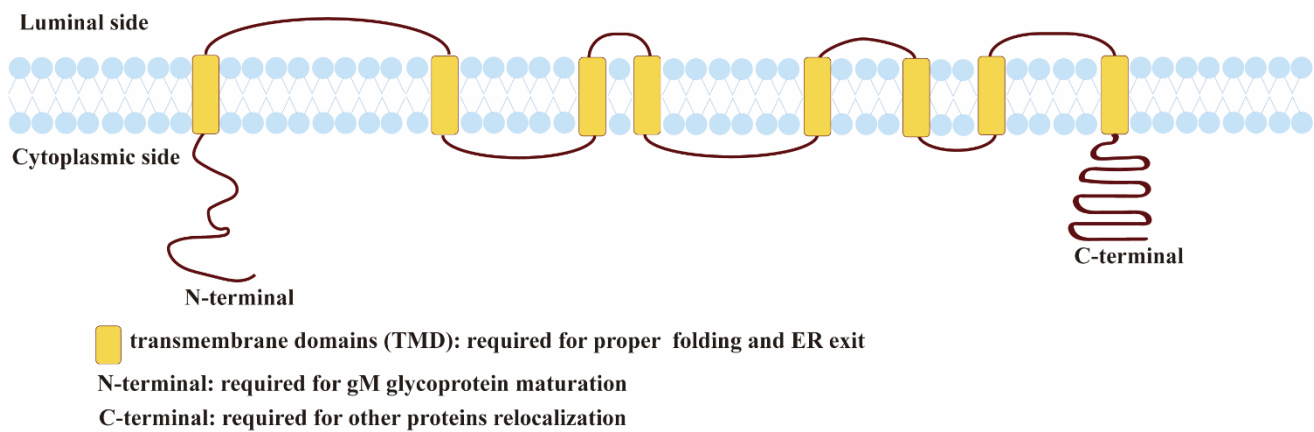

Supplementary Figure 1. Predicted topology of HSV-1 gM.

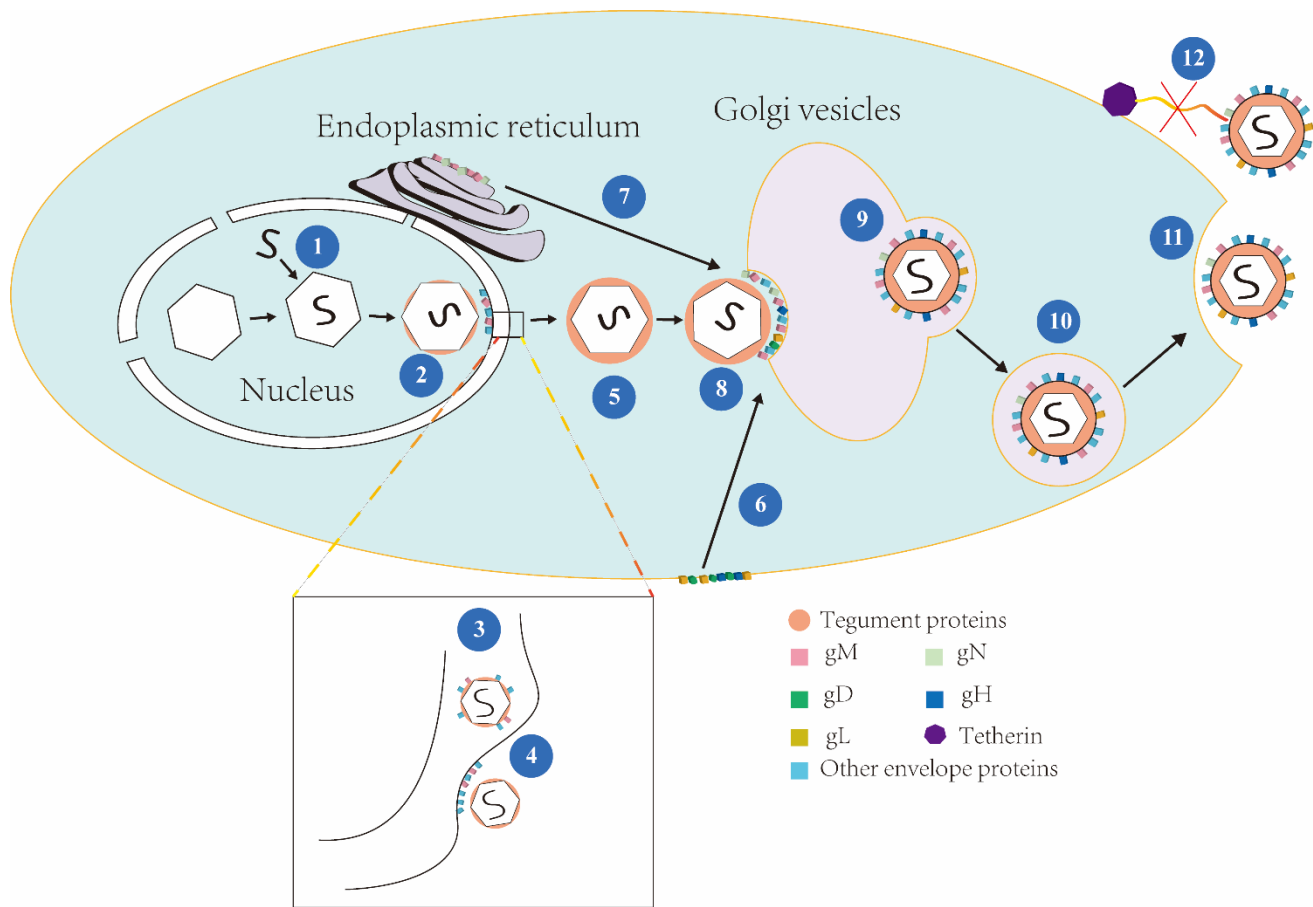

Supplementary Figure 2. The involvement of gM in the life cycle of HSV-1(Kelly et al., 2009).

1.2 Supplementary Tables

TABLE 1. gM gene of specific alphaherpesviruses and its function

| Virus | Gene  | Protein | Type of protein                | Function in life cycle                                                | references                                                          |
|-------|-------|---------|--------------------------------|-----------------------------------------------------------------------|---------------------------------------------------------------------|
| HSV-1 | UL10  | gM      | type III transmembrane protein | modulate the viral fusion machinery with gN                           | (Striebinger et al., 2015)                                          |
| HSV-2 | UL10  | gM      | /                              | /                                                                     | (Dolan et al., 1998)                                                |
| BHV-1 | UL10  | gM      | type III transmembrane protein | Help gN and VP22 incorporate to virion                                | (Lipińska et al., 2006; Pannhorst et al., 2018)                     |
| EHV-1 | ORF52 | gM      | type III transmembrane protein | involved in virus egress and fusion                                   | (Rudolph and Osterrieder, 2002)                                     |
| EHV-4 | ORF52 | gM      | type III transmembrane protein | Ensure virus egress and cell-to-cell spread                           | (Ziegler et al., 2005)                                              |
| VZV   | ORF50 | gM      | type III transmembrane protein | Ensure virus cell-to-cell spread                                      | (Yamagishi et al., 2008; Sadaoka et al., 2010; Lebrun et al., 2018) |
| PRV   | UL10  | gM      | /                              | inhibits membrane fusion and involved in axonal sorting and transport | (Brack et al., 1999; Kratchmarov et al., 2015)                      |
| MDV   | UL10  | gM      | /                              | essential for virus growth in cultured cells                          | (Cai et al., 1999; Tischer et al., 2002)                            |
| ILTV  | UL10  | gM      | /                              | /                                                                     | (Veits et al., 2003)                                                |
| DEV   | UL10  | gM      | /                              | /                                                                     | (Wu et al., 2012)                                                   |
